# Supplementary material for: Simulated stable water isotopes during the mid-Holocene and pre-industrial using AWI-ESM-2.1-wiso
Source: Copernicus journal article supplement (doi:10.5194/gmd-2023-68), 2023-05-16
Supplement: Supplementary file 1 [file gmd-2023-68-supplement.pdf]

# **Supplementary figures for "Simulated stable water isotopes during the mid-Holocene and pre-industrial using AWI-ESM-wiso"**

Xiaoxu Shi<sup>1,2</sup>, Alexandre Cauquoin<sup>3</sup>, Gerrit Lohmann<sup>1,4</sup>, Lukas Jonkers<sup>4</sup>, Qiang Wang<sup>1</sup>, Hu Yang<sup>1,4</sup>, Yuchen Sun<sup>1,5</sup>, and Martin Werner<sup>1</sup>

<sup>1</sup>Alfred Wegener Institute, Helmholtz Center for Polar and Marine Research, Bremerhaven, Germany

<sup>2</sup>Southern Marine Science and Engineering Guangdong Laboratory (Zhuhai), Zhuhai, China

<sup>3</sup>Institute of Industrial Science, The University of Tokyo, Kashiwa, Japan

<sup>4</sup>MARUM Center for Marine Environmental Sciences, University of Bremen, Bremen, Germany

<sup>5</sup>Institute of Tibetan Plateau Research, Chinese Academy of Sciences, Beijing, China

**Correspondence:** Martin Werner (martin.werner@awi.de)

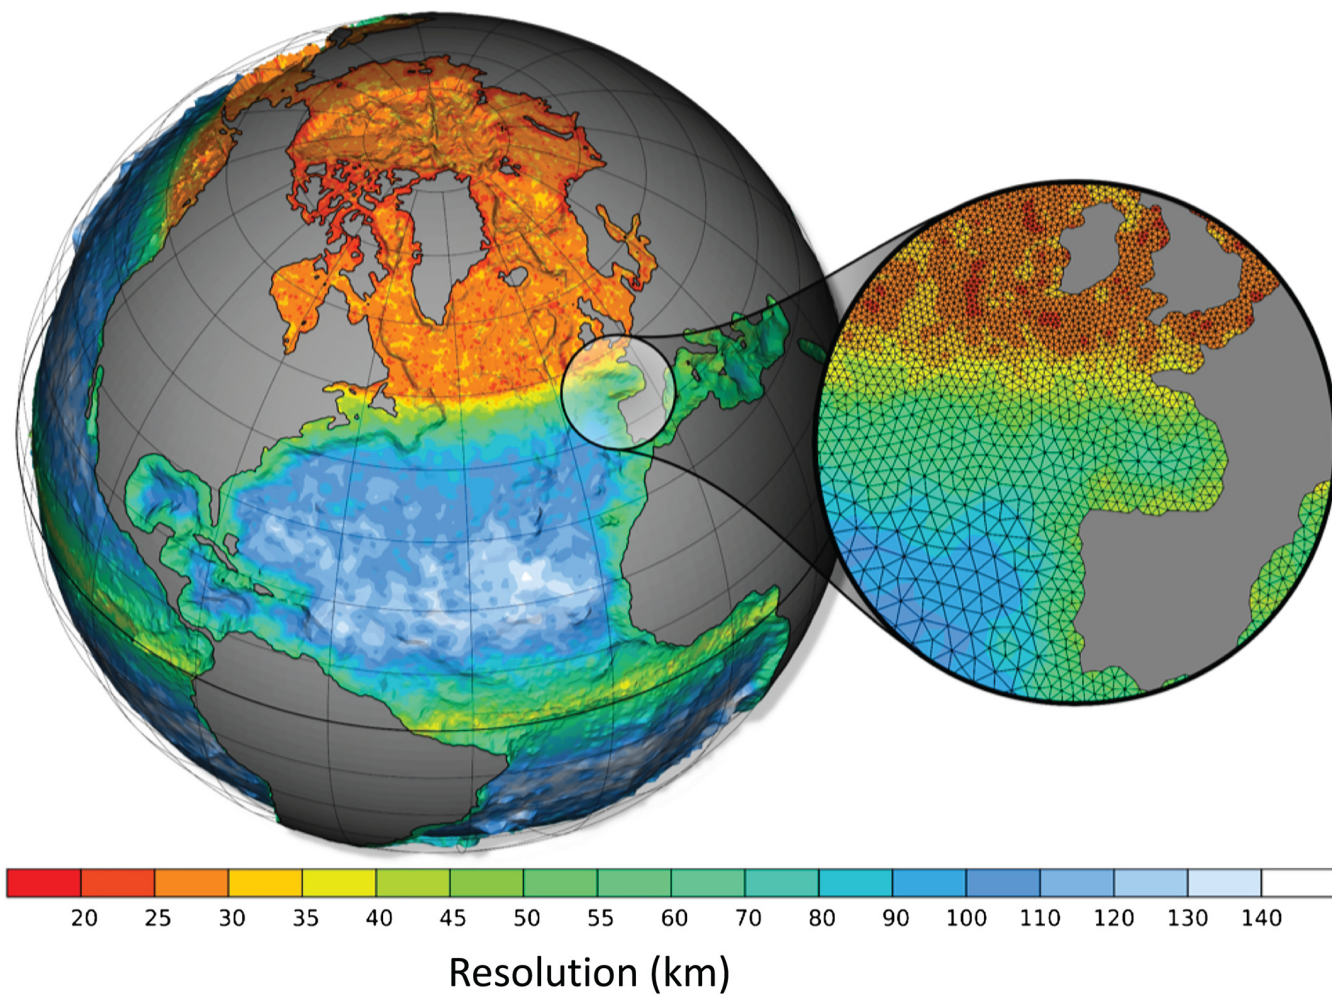

**Figure S1.** Resolution of ocean grid.

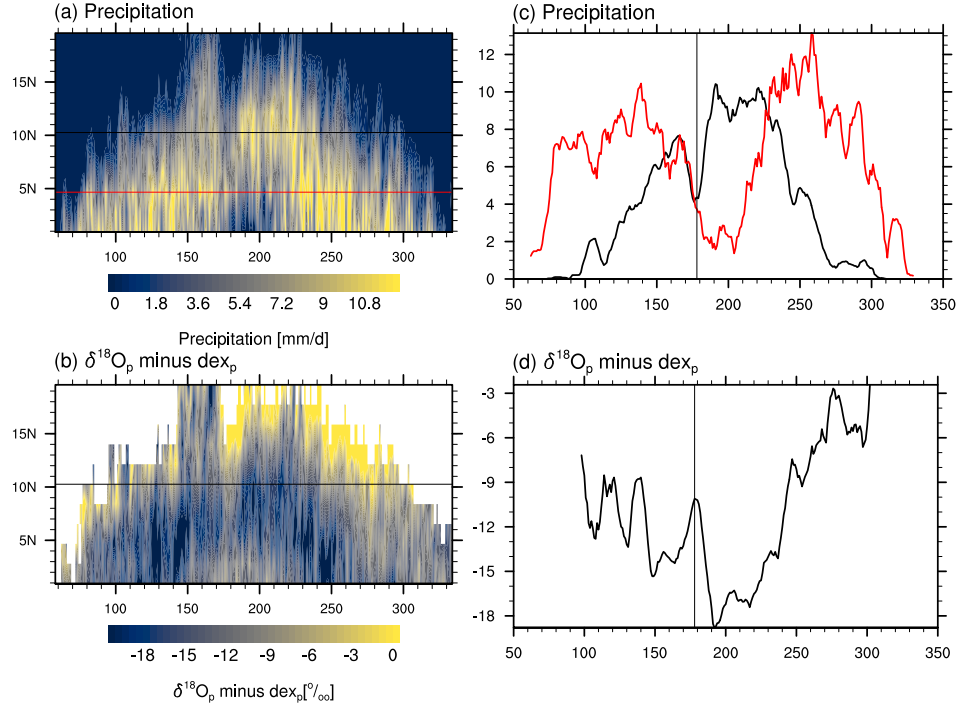

**Figure S2.** Simulated temporal time–latitude diagram of daily (a) precipitation and (b)  $I$  averaged over 15°W - 20°E under MH climate condition for a specific year, with x-axis representing the day of the year and y-axis the latitude. (c) Time sections of precipitation averaged over 15°W - 20°E at 12.3°N (black line) and at 4.7°N (red line), filtered with high frequency variability (period less than 10 days) removed. (d) Time sections of  $I$  averaged over 15°W - 20°E at 12.3°N, filtered with high frequency variability (period less than 10 days) removed.

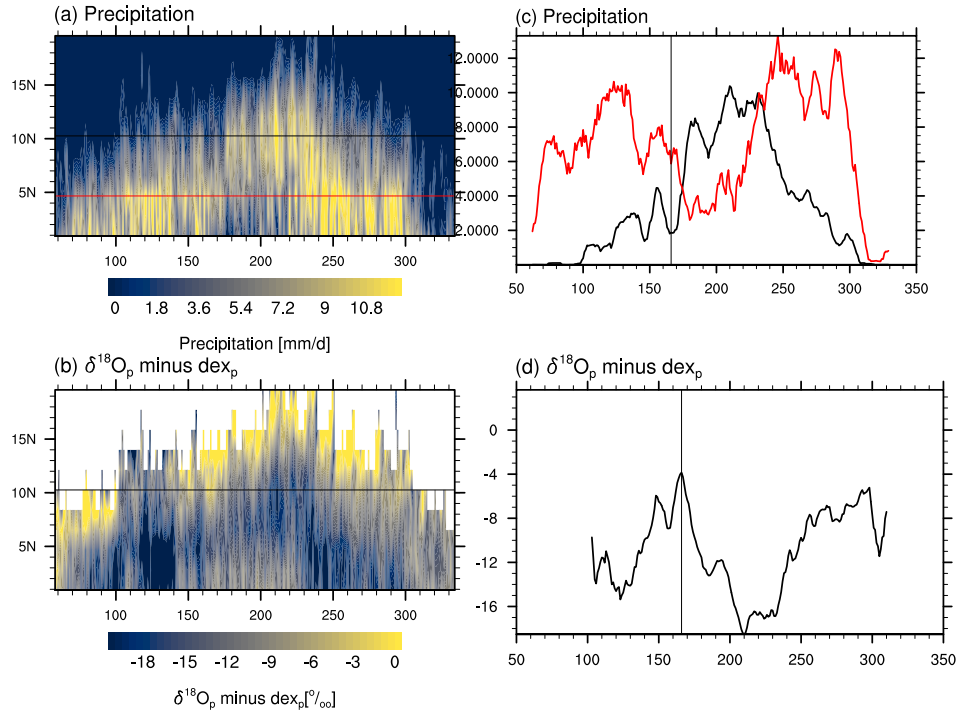

**Figure S3.** Simulated temporal time-latitude diagram of daily (a) precipitation and (b)  $I$  averaged over 15°W - 20°E under MH climate condition for a specific year, with x-axis representing the day of the year and y-axis the latitude. (c) Time sections of precipitation averaged over 15°W - 20°E at 12.3°N (black line) and at 4.7°N (red line), filtered with high frequency variability (period less than 10 days) removed. (d) Time sections of  $I$  averaged over 15°W - 20°E at 12.3°N, filtered with high frequency variability (period less than 10 days) removed.

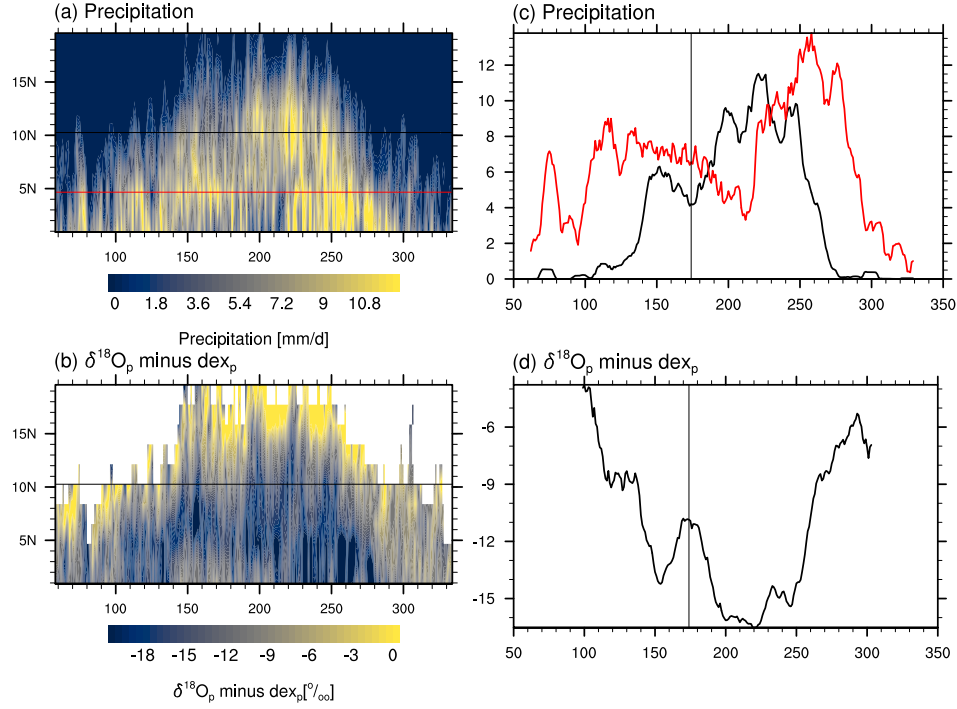

**Figure S4.** Simulated temporal time–latitude diagram of daily (a) precipitation and (b)  $I$  averaged over 15°W - 20°E under MH climate condition for a specific year, with x-axis representing the day of the year and y-axis the latitude. (c) Time sections of precipitation averaged over 15°W - 20°E at 12.3°N (black line) and at 4.7°N (red line), filtered with high frequency variability (period less than 10 days) removed. (d) Time sections of  $I$  averaged over 15°W - 20°E at 12.3°N, filtered with high frequency variability (period less than 10 days) removed.

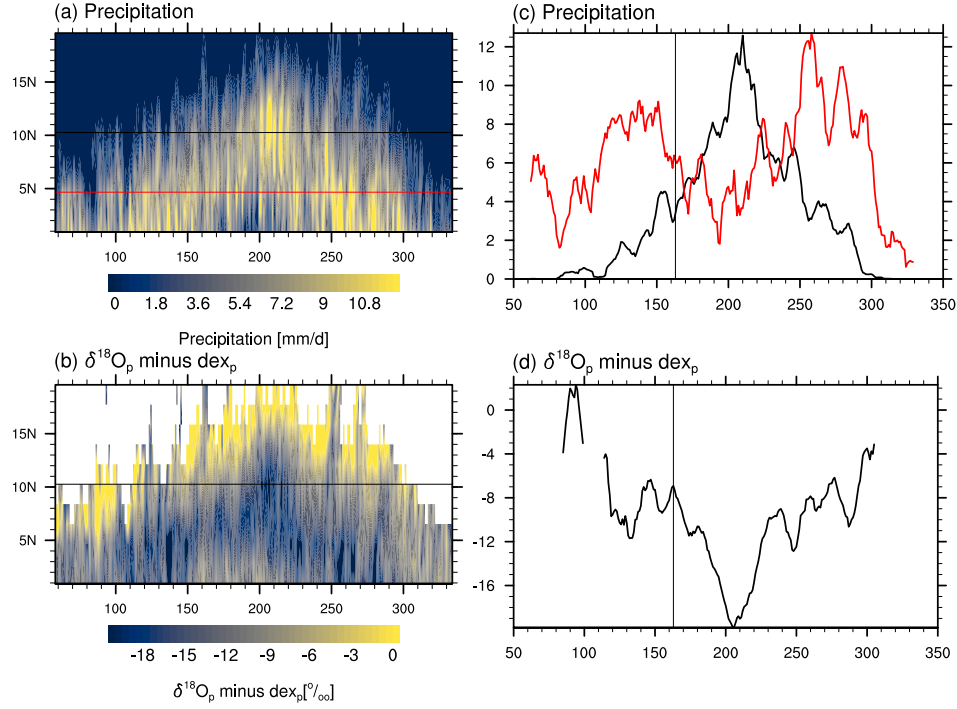

**Figure S5.** Simulated temporal time–latitude diagram of daily (a) precipitation and (b)  $I$  averaged over 15°W - 20°E under MH climate condition for a specific year, with x-axis representing the day of the year and y-axis the latitude. (c) Time sections of precipitation averaged over 15°W - 20°E at 12.3°N (black line) and at 4.7°N (red line), filtered with high frequency variability (period less than 10 days) removed. (d) Time sections of  $I$  averaged over 15°W - 20°E at 12.3°N, filtered with high frequency variability (period less than 10 days) removed.
